# Supplementary material for: Integrated Transcriptomic and Metabolomic Analyses Reveal Trade-Off Mechanisms Underlying Phosphorus Acquisition Strategies in Soybean Roots
Source: Research Square preprint supplement (doi:10.21203/rs.3.rs-7738053/v1), 2025-10-20
Supplement: Supplementary file 1 [file 0284d43352e84c66b20a6d27.docx]

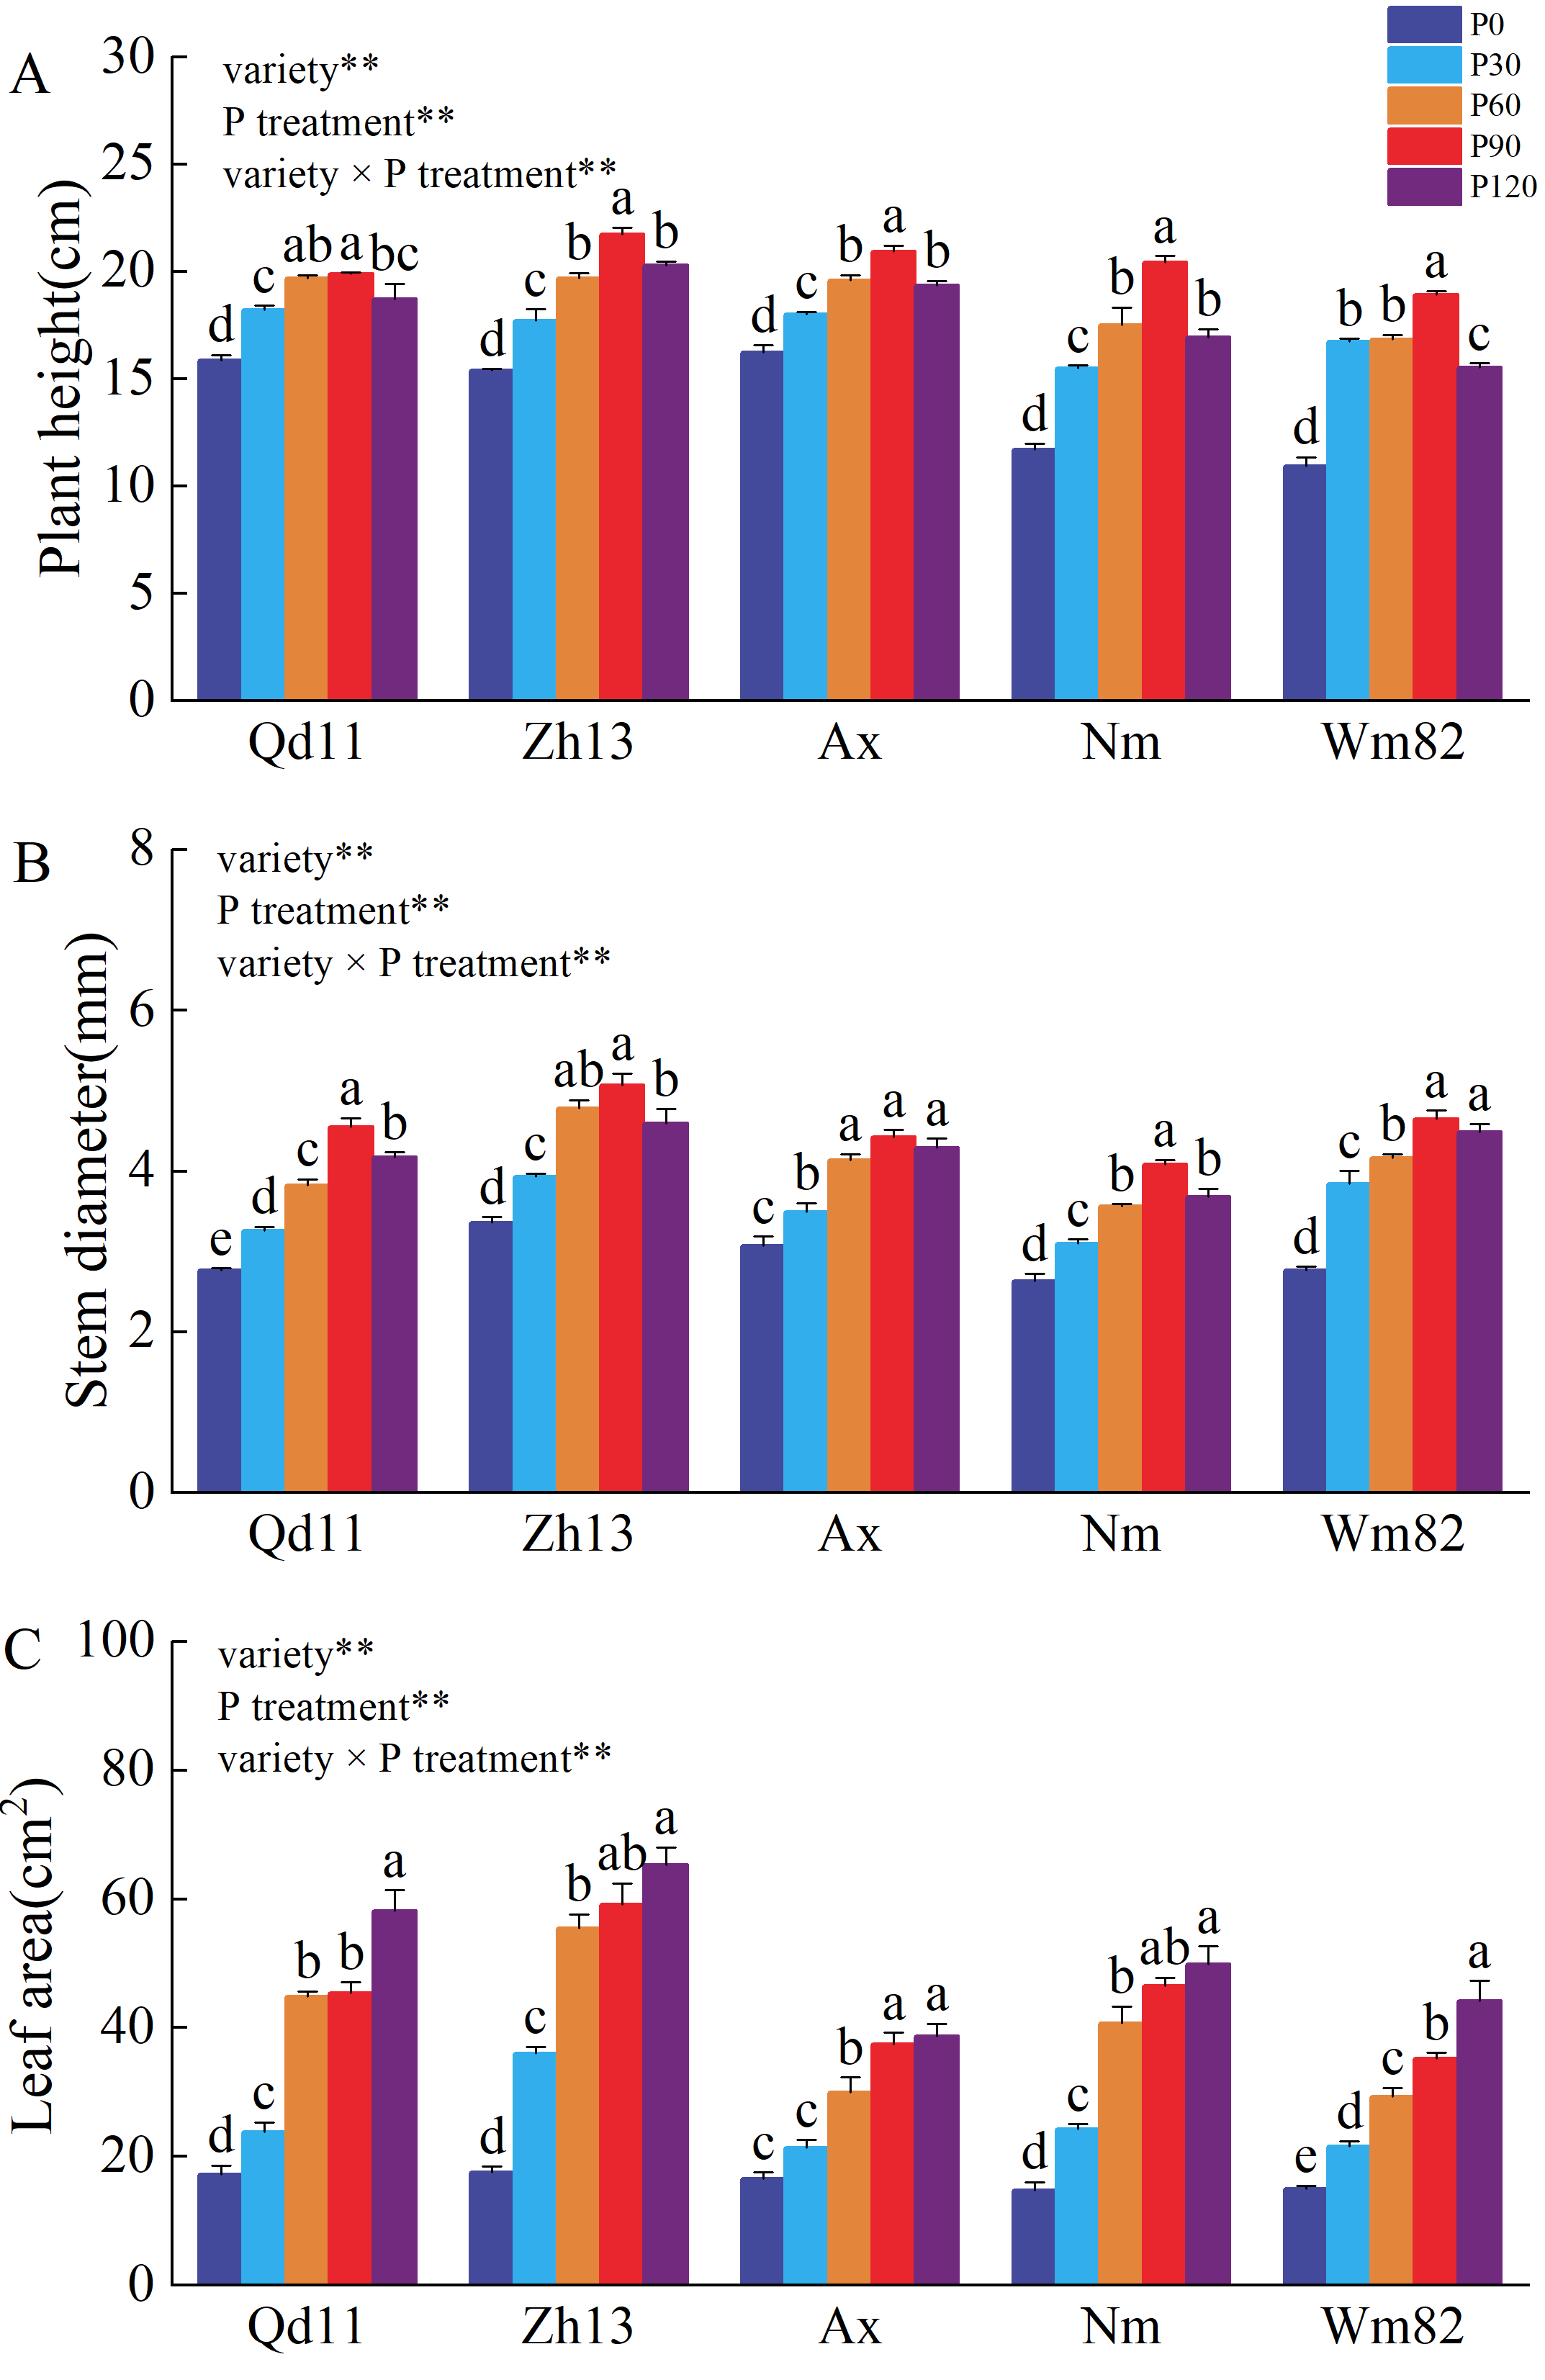


Figure S1 The effects of soil phosphorus availability on plant height and stem diameter of soybean

Note: Lowercase letters indicate significant differences in the same variety under different phosphorus treatments (P < 0.05), and "*, **" represent significance at the 0.05 and 0.01 levels, respectively. This convention applies to all supplementary figures unless otherwise stated.


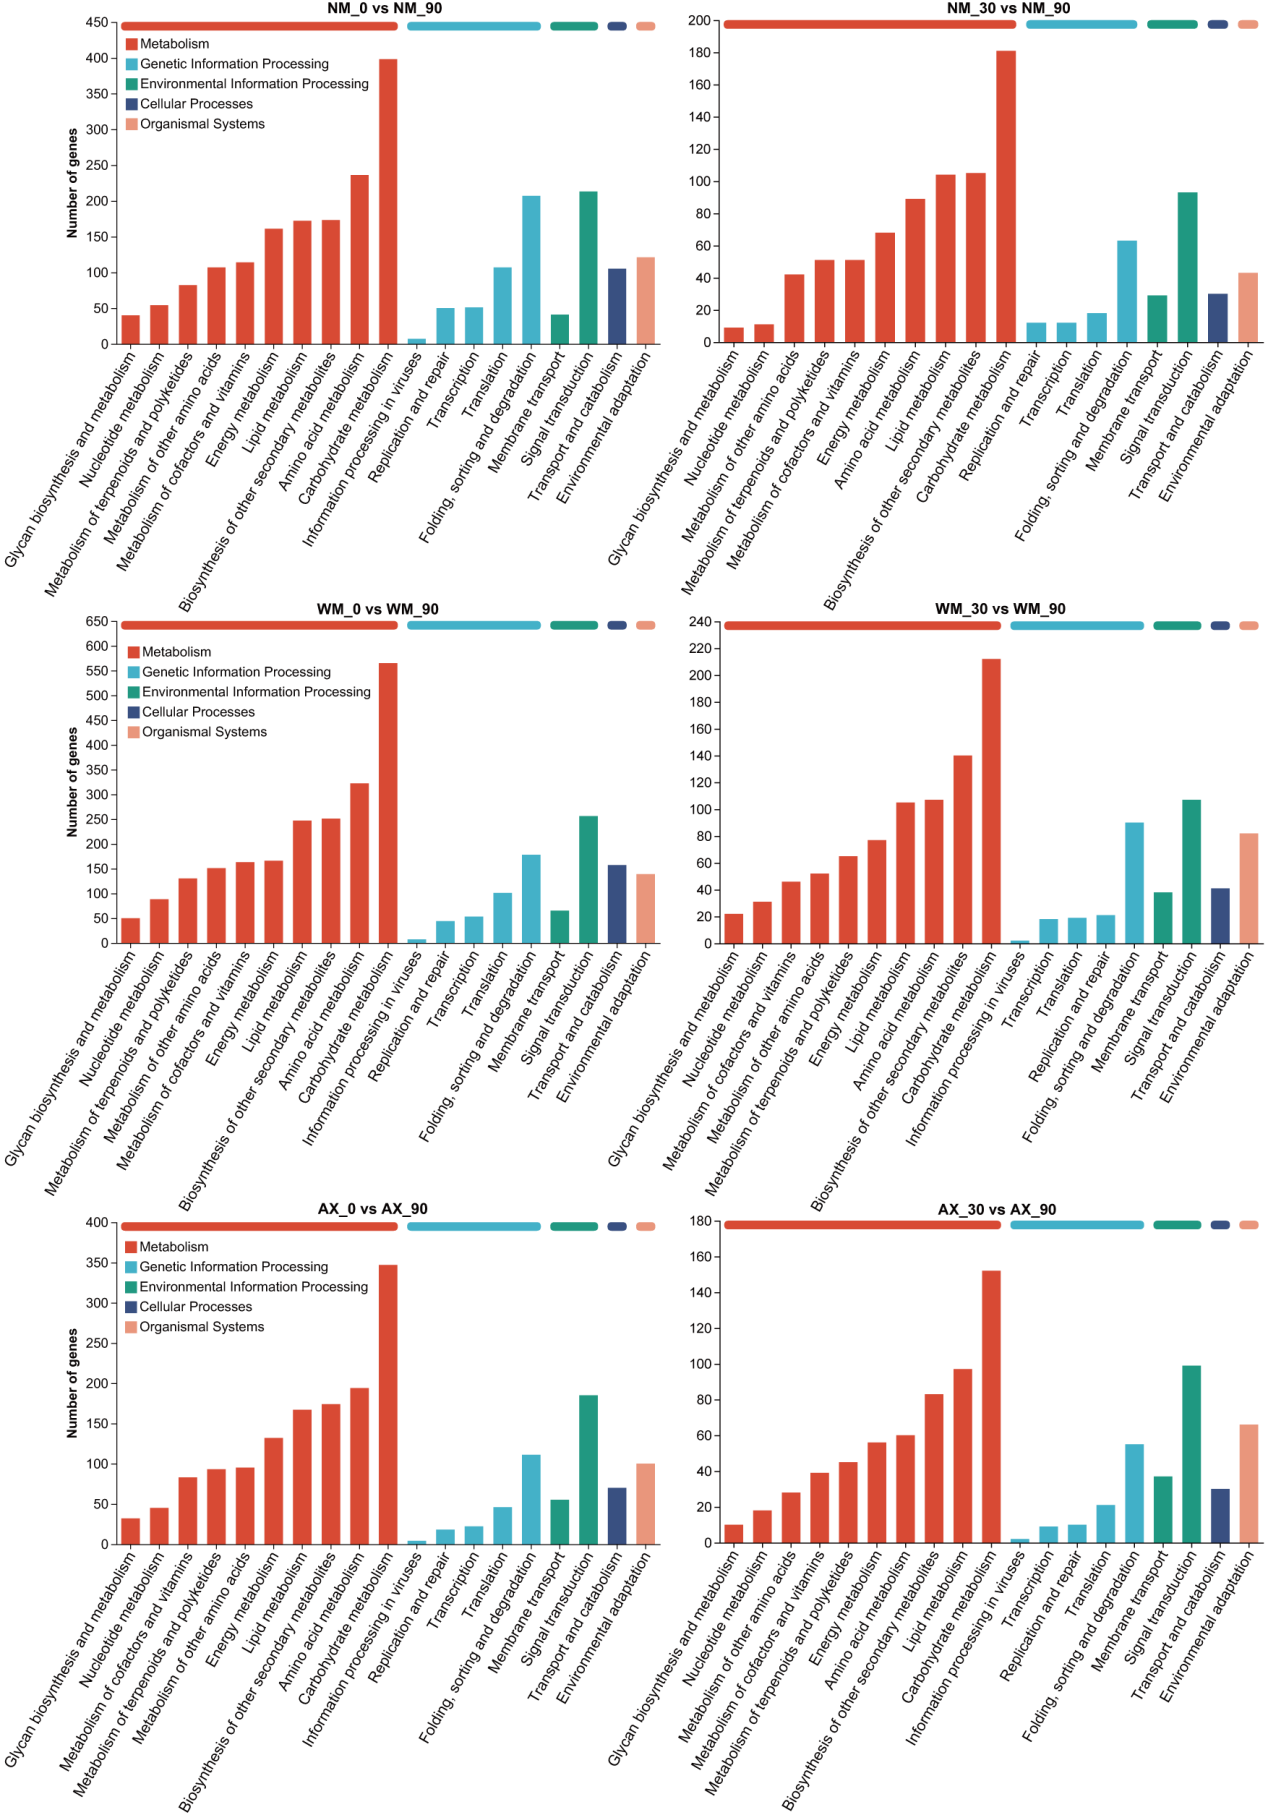


Figure S2 KEGG enrichment analysis of DAMs in soybean roots


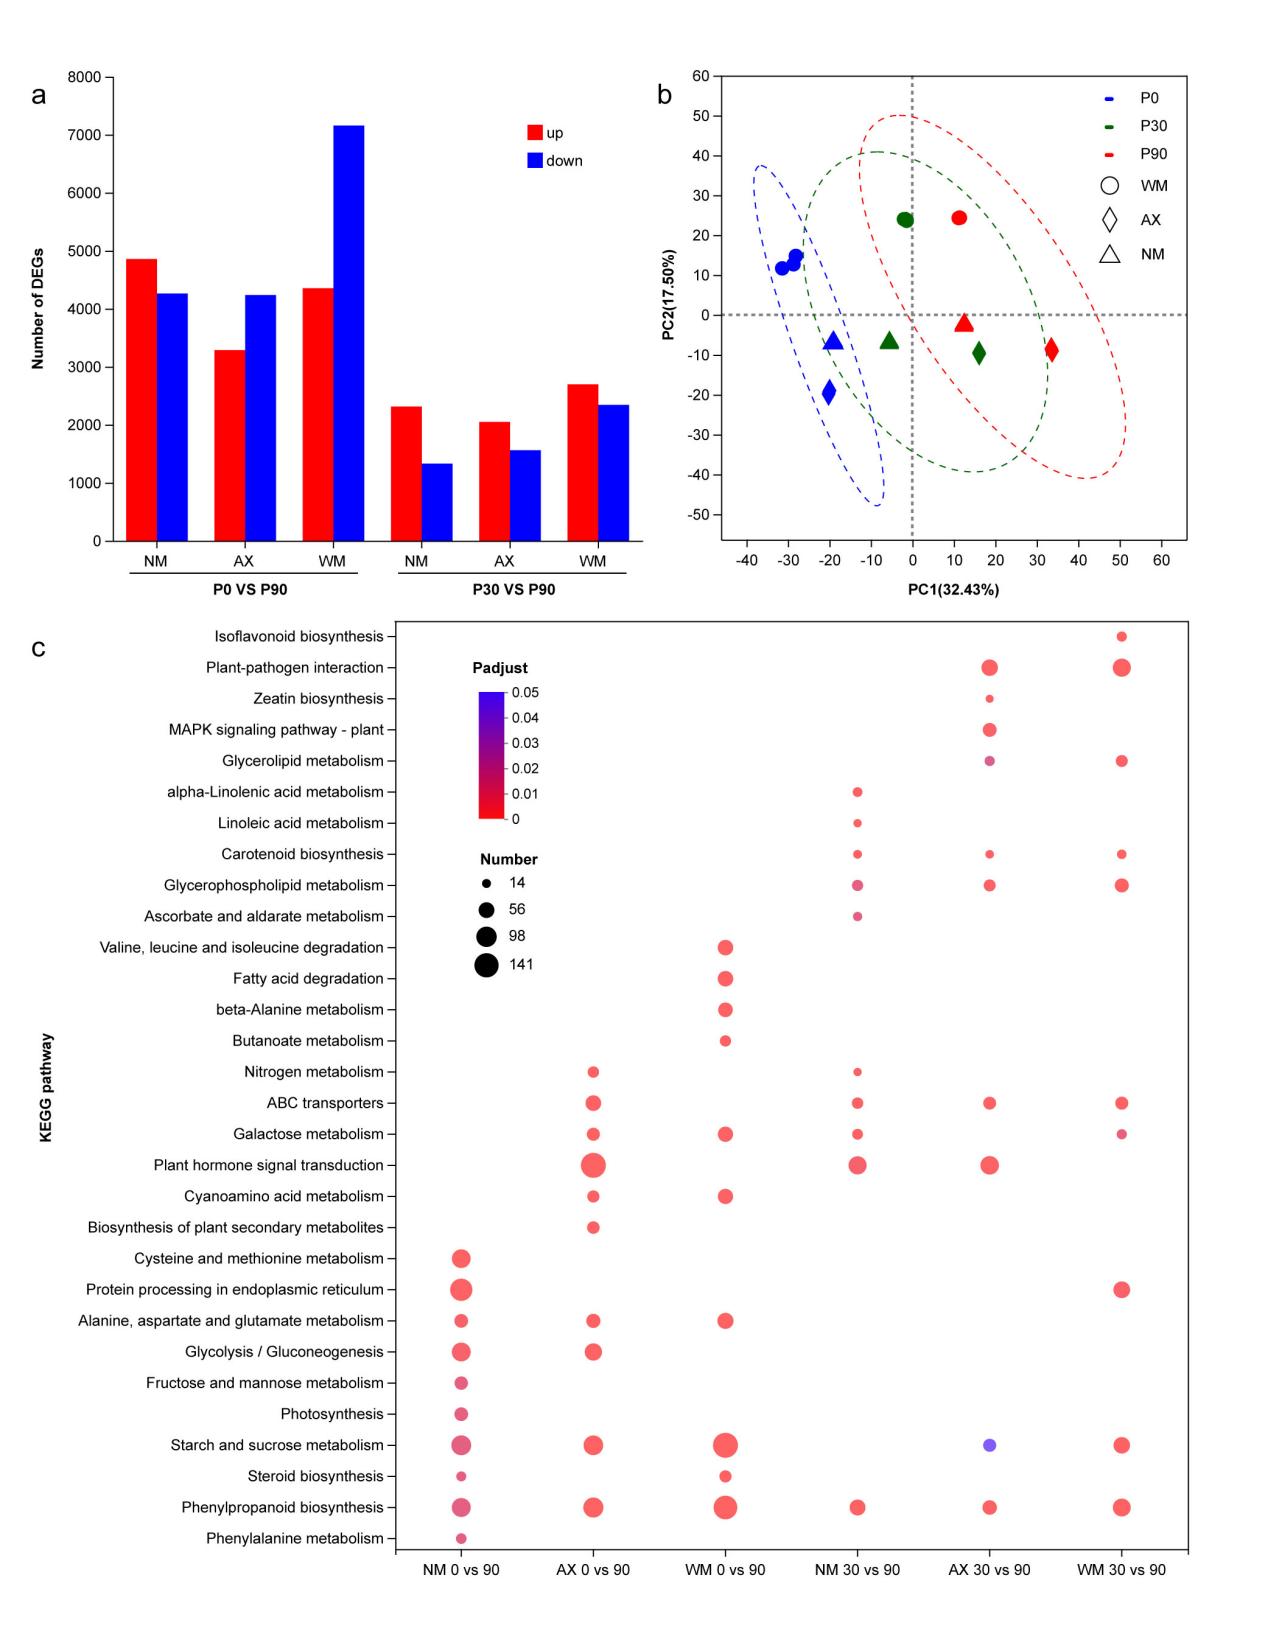


Figure S3 KEGG enrichment analysis of differentially expressed genes in soybean root system

Note: A, represents the expression of root DEGs under different phosphorus treatments;

B, PCA analysis of gene expression in three soybean varieties under different phosphorus treatments;

C, KEGG enrichment analysis of differentially expressed genes in soybean root system.
