# Supplementary material for: Integrated Transcriptomic and Metabolomic Analyses Reveal Trade-Off Mechanisms Underlying Phosphorus Acquisition Strategies in Soybean Roots
Source: Research Square preprint supplement (doi:10.21203/rs.3.rs-7738053/v1), 2025-10-20
Supplement: Supplementary file 2 [file 3587a6a328a1afc757b075b5.docx]

**Table S1 Soil physico-chemical properties**

| Cultivation Systems | Content | Cultivation Systems | Content |
| --- | --- | --- | --- |
| SOM(g·kg-1) | 3.38 | pH | 4.95 |
| TN(g·kg-1) | 0.52 | AN(mg·kg-1) | 22 |
| TP(g·kg-1) | 0.32 | AP(mg·kg-1) | 3 |
| TK(g·kg-1) | 3.51 | AK(mg·kg-1) | 23 |

Note: SOM, soil organic matter; TN, total nitrogen; TK, total potassium; TP, total phosphorus; AN, alkaline hydrolysable nitrogen; AK, available potassium; AP, available phosphorus.

**Table S2 Nutrient solution formulas**

| Compound | Content  (mmol·L-1) | Compound | Content  (mmol·L-1) | Compound | Content  (mmol·L-1) |
| --- | --- | --- | --- | --- | --- |
| KNO3 | 1.5 | MgCl2 | 0.025 | (NH4)2MoO4 | 0.00015 |
| Ca(NO3)2 | 1.2 | MnSO4 | 0.0015 | Na2B4O7·10H₂O | 0.0025 |
| NH4NO3 | 0.4 | (NH4)2SO4 | 0.3 | CoCl2 | 0.0001 |
| K2SO4 | 0.3 | ZnSO4 | 0.0015 | Fe-EDTA | 0.04 |
| MgSO4 | 0.5 | CuSO4 | 0.0005 |  |  |

**Table S3 Metabolomics feature detection and annotation summary**

| Ion mode | Total features | Identified metabolites | Library matches | KEGG mapped |
| --- | --- | --- | --- | --- |
| pos | 5521 | 1072 | 1000 | 576 |
| neg | 6139 | 1117 | 1074 | 575 |

Note: LC–MS was performed on a UHPLC–Q Exactive HF-X with an HSS T3 column under positive/negative ESI modes. Raw files were processed in Progenesis QI to generate a feature matrix (RT, m/z, peak area); metabolites were annotated by MS/MS matching to HMDB/METLIN (mass error < 10 ppm). QC pooled samples were injected every 5–15 runs to assess stability. Thresholds and statistics follow the Materials and Methods.

**Table S4 Quality control of transcriptome sequencing data**

| Sample | Raw reads | Clean reads | Error rate (%) | Q20 (%) | Q30 (%) | GC content (%) |
| --- | --- | --- | --- | --- | --- | --- |
| Nm_0_1 | 49237796 | 48683278 | 0.0248 | 98.09 | 94.47 | 44.54 |
| Nm_0_2 | 50130018 | 48603926 | 0.0255 | 97.30 | 94.87 | 44.53 |
| Nm_0_3 | 43197030 | 42700086 | 0.0247 | 98.09 | 94.50 | 44.18 |
| Wm_0_1 | 42793010 | 42331688 | 0.0249 | 98.05 | 94.34 | 44.75 |
| Wm_0_2 | 42725534 | 42285872 | 0.0249 | 98.03 | 94.32 | 44.68 |
| Wm_0_3 | 42776324 | 42351066 | 0.0252 | 97.91 | 93.99 | 44.68 |
| Wm_30_1 | 45733736 | 45238624 | 0.025 | 97.99 | 94.24 | 45.37 |
| Wm_30_2 | 43087380 | 42741628 | 0.0248 | 98.09 | 94.43 | 45.27 |
| Wm_30_3 | 42741668 | 42348118 | 0.0249 | 98.04 | 94.34 | 45.34 |
| Wm_90_1 | 43616990 | 43187514 | 0.025 | 97.98 | 94.16 | 44.75 |
| Wm_90_2 | 41531462 | 41133398 | 0.0251 | 97.95 | 94.09 | 44.71 |
| Wm_90_3 | 49344944 | 48850100 | 0.025 | 97.98 | 94.19 | 45.22 |
| Nm_30_1 | 43189686 | 42745584 | 0.0258 | 97.70 | 93.46 | 44.79 |
| Nm_30_2 | 51649792 | 51098366 | 0.0251 | 97.95 | 94.12 | 45.28 |
| Nm_30_3 | 52324408 | 51778412 | 0.0248 | 98.07 | 94.46 | 45.07 |
| Nm_90_1 | 46073612 | 45664770 | 0.025 | 97.98 | 94.17 | 44.84 |
| Nm_90_2 | 48708748 | 48279664 | 0.0252 | 97.93 | 94.02 | 44.9 |
| Nm_90_3 | 50344562 | 49861600 | 0.0251 | 97.97 | 94.15 | 44.7 |
| Ax_0_1 | 45551916 | 45097412 | 0.0249 | 98.02 | 94.29 | 44.72 |
| Ax_0_2 | 49401172 | 48730876 | 0.0253 | 97.85 | 93.91 | 44.84 |
| Ax_0_3 | 42806436 | 42366030 | 0.0256 | 97.81 | 93.66 | 44.79 |
| Ax_30_1 | 47959632 | 47524262 | 0.0247 | 98.09 | 94.49 | 44.86 |
| Ax_30_2 | 45280614 | 44803974 | 0.0247 | 98.08 | 94.50 | 45.06 |
| Ax_30_3 | 49356436 | 48893472 | 0.0252 | 97.93 | 94.03 | 45.15 |
| Ax_90_1 | 42470818 | 41991328 | 0.0251 | 97.97 | 94.19 | 45.13 |
| Ax_90_2 | 57484824 | 56933816 | 0.0249 | 98.03 | 94.32 | 45.27 |
| Ax_90_3 | 44678458 | 44259842 | 0.0247 | 98.10 | 94.50 | 45.18 |

Note: (1) Sample: Sample name; (2) Raw reads: The total number of entries in the original sequencing data; (3) Clean reads: The total number of entries in the sequencing data after quality control; (4) Error rate (%): The average error rate of sequencing bases corresponding to quality control data, generally below 0.1%; (5) Q20 (%) and Q30 (%): Evaluate the quality of sequencing data after quality control. Q20 and Q30 refer to the percentage of bases with sequencing quality above 99% and 99.9%, respectively, in the total number of bases. Generally, Q20 is above 85% and Q30 is above 80%; (6) GC content (%): The percentage of the total number of G and C bases corresponding to the quality control data to the total number of bases.

**Table S5 Summary of Sequence Comparison Results**

| Sample | Total reads | Total mapped | Multiple mapped | Uniquely mapped |
| --- | --- | --- | --- | --- |
| Nm_0_1 | 48683278 | 45001714 (92.44%) | 1195245 (2.46%) | 43806469 (89.98%) |
| Nm_0_2 | 48603926 | 43114023 (88.7%) | 1385606 (2.85%) | 41728417 (85.85%) |
| Nm_0_3 | 42700086 | 40009610 (93.7%) | 1140082 (2.67%) | 38869528 (91.03%) |
| Wm_0_1 | 42331688 | 40024887 (94.55%) | 1151392 (2.72%) | 38873495 (91.83%) |
| Wm_0_2 | 42285872 | 40019397 (94.64%) | 1171057 (2.77%) | 38848340 (91.87%) |
| Wm_0_3 | 42351066 | 40005014 (94.46%) | 1148839 (2.71%) | 38856175 (91.75%) |
| Wm_30_1 | 45238624 | 43048322 (95.16%) | 1331647 (2.94%) | 41716675 (92.21%) |
| Wm_30_2 | 42741628 | 40746421 (95.33%) | 1266301 (2.96%) | 39480120 (92.37%) |
| Wm_30_3 | 42348118 | 40386350 (95.37%) | 1242919 (2.94%) | 39143431 (92.43%) |
| Wm_90_1 | 43187514 | 41025156 (94.99%) | 1120122 (2.59%) | 39905034 (92.4%) |
| Wm_90_2 | 41133398 | 39162563 (95.21%) | 1082655 (2.63%) | 38079908 (92.58%) |
| Wm_90_3 | 48850100 | 47087545 (96.39%) | 1311308 (2.68%) | 45776237 (93.71%) |
| Nm_30_1 | 42745584 | 40427846 (94.58%) | 1189482 (2.78%) | 39238364 (91.8%) |
| Nm_30_2 | 51098366 | 48435930 (94.79%) | 1481228 (2.9%) | 46954702 (91.89%) |
| Nm_30_3 | 51778412 | 49115691 (94.86%) | 1500398 (2.9%) | 47615293 (91.96%) |
| Nm_90_1 | 45664770 | 42698360 (93.5%) | 1257523 (2.75%) | 41440837 (90.75%) |
| Nm_90_2 | 48279664 | 44466318 (92.1%) | 1339058 (2.77%) | 43127260 (89.33%) |
| Nm_90_3 | 49861600 | 46601195 (93.46%) | 1377219 (2.76%) | 45223976 (90.7%) |
| Ax_0_1 | 45097412 | 43000666 (95.35%) | 1327257 (2.94%) | 41673409 (92.41%) |
| Ax_0_2 | 48730876 | 46374156 (95.16%) | 1425332 (2.92%) | 44948824 (92.24%) |
| Ax_0_3 | 42366030 | 40384269 (95.32%) | 1240469 (2.93%) | 39143800 (92.39%) |
| Ax_30_1 | 47524262 | 44704908 (94.07%) | 1364679 (2.87%) | 43340229 (91.2%) |
| Ax_30_2 | 44803974 | 41757042 (93.2%) | 1289744 (2.88%) | 40467298 (90.32%) |
| Ax_30_3 | 48893472 | 45860525 (93.8%) | 1449443 (2.96%) | 44411082 (90.83%) |
| Ax_90_1 | 41991328 | 39981788 (95.21%) | 1188570 (2.83%) | 38793218 (92.38%) |
| Ax_90_2 | 56933816 | 54085571 (95.0%) | 1685595 (2.96%) | 52399976 (92.04%) |
| Ax_90_3 | 44259842 | 42065020 (95.04%) | 1274590 (2.88%) | 40790430 (92.16%) |

Note: (1) Sample: Sample name; (2) Total reads: Statistics of the number of filtered sequencing sequences (i.e. Clean reads); (3) Total mapped: The number of Clean reads that can be located on the genome; (4) Multiple mapped: The number of Clean reads with multiple aligned positions on the reference sequence; (5) Unique mapped: The number of Clean reads with unique alignment positions on the reference sequence.

**Table S6 The effect of soil phosphorus availability on soybean root morphology**

| Variety | P treatment | average diameter  (mm) | Root density  (g·cm-3) | Root/Shoot ratio |
| --- | --- | --- | --- | --- |
| Qd11 | P0 | 0.423±0.009b | 0.107±0.002b | 0.460±0.021a |
| P30 | 0.437±0.015b | 0.121±0.008b | 0.187±0.009b |
| P60 | 0.46±0.017b | 0.173±0.009a | 0.140±0.020b |
| P90 | 0.533±0.033a | 0.13±0.012b | 0.150±0.006b |
| P120 | 0.553±0.009a | 0.111±0.002b | 0.157±0.003b |
| Zh13 | P0 | 0.43±0.006b | 0.118±0.002c | 0.360±0.0260a |
| P30 | 0.493±0.015a | 0.151±0.010b | 0.193±0.012b |
| P60 | 0.487±0.013ab | 0.158±0.006b | 0.153±0.009b |
| P90 | 0.487±0.023ab | 0.168±0.014b | 0.187±0.009b |
| P120 | 0.5±0.025a | 0.209±0.007a | 0.180±0.010b |
| Ax | P0 | 0.437±0.023b | 0.113±0.007b | 0.440±0.079a |
| P30 | 0.51±0.026ab | 0.126±0.010ab | 0.233±0.027b |
| P60 | 0.537±0.026a | 0.146±0.013a | 0.217±0.026b |
| P90 | 0.537±0.028a | 0.144±0.008a | 0.153±0.018b |
| P120 | 0.46±0.02ab | 0.148±0.003a | 0.110±0.015b |
| Nm | P0 | 0.447±0.023b | 0.080±0.009c | 0.500±0.031a |
| P30 | 0.49±0.021ab | 0.089±0.003c | 0.173±0.003c |
| P60 | 0.523±0.029a | 0.123±0.005b | 0.263±0.007b |
| P90 | 0.513±0.019ab | 0.143±0.001a | 0.207±0.009c |
| P120 | 0.493±0.009ab | 0.141±0.007ab | 0.180±0.010c |
| Wm82 | P0 | 0.41±0.026b | 0.092±0.010c | 0.290±0.031a |
| P30 | 0.46±0.026b | 0.147±0.012b | 0.240±0.026ab |
| P60 | 0.433±0.007b | 0.194±0.009a | 0.177±0.017b |
| P90 | 0.553±0.035a | 0.133±0.006b | 0.173±0.013b |
| P120 | 0.487±0.033ab | 0.135±0.009b | 0.187±0.032b |

Note: Different lowercase letters within a column indicate significant differences among P levels for a given variety (Duncan, P < 0.05)

**Table S7 The effect of soil phosphorus availability on soybean root exudates**

| Variety | P treatment | Oxalic acid  mg·h-1·g-1 | Acetic acid  mg·h-1·g-1 | Citric acid  mg·h-1·g-1 | Succinic acid  mg·h-1·g-1 | Malic acid  mg·h-1·g-1 | Tartaric acid  mg·h-1·g-1 |
| --- | --- | --- | --- | --- | --- | --- | --- |
| Qd11 | P0 | 8.592±0.422a | 1.805±0.084b | 0.508±0.030a | 0.257±0.014b | 0.031±0.002b | 8.186±0.662a |
| P30 | 2.104±0.127b | 3.698±0.143a | 0.293±0.033b | 0.640±0.078a | 0.062±0.004a | 2.431±0.139b |
| P60 | 0.320±0.019c | 1.035±0.075c | 0.191±0.017c | 0.079±0.001c | 0.014±0.001c | 0.833±0.040c |
| P90 | 0.110±0.022c | 0.803±0.075c | 0.041±0.001d | 0.19±0.016bc | 0.015±0.002c | 0.283±0.015c |
| P120 | 0.127±0.014c | 0.096±0.005d | 0.047±0.003d | 0.166±0.013bc | 0.012±0.002c | 0.246±0.012c |
| Zh13 | P0 | 7.840±0.488a | 4.964±0.291a | 0.271±0.011a | 0.426±0.037a | 0.056±0.002a | 8.356±0.436a |
| P30 | 1.139±0.035b | 1.853±0.075b | 0.191±0.015b | 0.282±0.019b | 0.024±0.002b | 1.396±0.042b |
| P60 | 0.231±0.014c | 0.494±0.039c | 0.162±0.012b | 0.206±0.011c | 0.022±0.002b | 0.577±0.029c |
| P90 | 0.159±0.017c | 0.962±0.050d | 0.091±0.001c | 0.126±0.003d | 0.012±0.001c | 0.525±0.037c |
| P120 | 0.143±0.007c | 0.107±0.007d | 0.092±0.008c | 0.028±0.004e | 0.020±0.001b | 0.245±0.017c |
| Ax | P0 | 11.051±1.213a | 1.150±0.102a | 0.436±0.053a | 0.246±0.017a | 0.093±0.017a | 9.900±1.026a |
| P30 | 1.942±0.156b | 0.797±0.056b | 0.245±0.017b | 0.154±0.006b | 0.041±0.003b | 2.38±0.168b |
| P60 | 0.144±0.008c | 0.212±0.014c | 0.126±0.002c | 0.047±0.003d | 0.014±0.001c | 0.338±0.013c |
| P90 | 0.070±0.003c | 0.189±0.012c | 0.016±0.001cd | 0.100±0.003c | 0.011±0.001c | 0.186±0.007c |
| P120 | 0.086±0.005c | 0.105±0.006c | 0.086±0.017d | 0.116±0.008c | 0.016±0.002c | 0.264±0.012c |
| Nm | P0 | 5.935±0.520a | 1.095±0.086b | 0.191±0.017a | 0.172±0.012b | 0.032±0.003a | 4.623±0.305a |
| P30 | 0.776±0.008b | 1.454±0.132a | 0.203±0.011a | 0.329±0.021a | 0.025±0.000ab | 1.202±0.018b |
| P60 | 0.134±0.006b | 0.217±0.022c | 0.117±0.016b | 0.090±0.006c | 0.023±0.007ab | 0.311±0.008c |
| P90 | 0.038±0.002b | 0.054±0.007c | 0.069±0.004d | 0.109±0.003c | 0.022±0.003ab | 0.075±0.005c |
| P120 | 0.044±0.003b | 0.063±0.005c | 0.114±0.010c | 0.102±0.018c | 0.014±0.002b | 0.087±0.006c |
| Wm82 | P0 | 7.632±0.605a | 1.498±0.048a | 0.216±0.020a | 0.257±0.010a | 0.047±0.007a | 7.278±0.539a |
| P30 | 1.233±0.154b | 0.498±0.011b | 0.133±0.016b | 0.197±0.013b | 0.028±0.002b | 1.292±0.04b |
| P60 | 0.204±0.012c | 0.325±0.029c | 0.091±0.015bc | 0.082±0.003d | 0.013±0.000c | 0.405±0.015c |
| P90 | 0.180±0.007c | 0.257±0.013c | 0.072±0.009cd | 0.111±0.010cd | 0.010±0.000c | 0.350±0.014c |
| P120 | 0.168±0.012c | 0.319±0.012c | 0.037±0.001d | 0.135±0.009d | 0.011±0.001c | 0.409±0.005c |

**Table S8 Expression of important genes in soybean response to phosphorus starvation（P30 vs P90）**

| Gene family | Gene ID | Gene Name | Gene description | Nm | Wm82 | Ax |
| --- | --- | --- | --- | --- | --- | --- |
| Padj | Regulation | Padj | Regulation | Padjust | Regulation |
| PHT | Glyma.10G186400 | GmPHT1;6 | phosphate transporter 1-6 | 2.71833E-32 | up | 1.49926E-32 | up | 5.76546E-21 | up |
| Glyma.10G186500 | GmPHT1;1 | phosphate transporter 1-1 | 1.0896E-129 | up | 5.2038E-258 | up | 0 | up |
| Glyma.19G164300 | GmPHT1;7 | phosphate transporter 1-7 | 0 | up | 0 | up | 0 | up |
| Glyma.20G204100 | GmPHT1;10 | phosphate transporter 1-10 | 1.81009E-26 | up | 7.96868E-12 | up | 4.85737E-51 | up |
| Glyma.02G005800 | GmPHT1;14 | phosphate transporter 1-14 | 1.0034E-249 | up | 0 | up | 0 | up |
| Glyma.10G006700 | GmPHT1;3 | phosphate transporter 1-3 | 1.61946E-87 | up | 0 | up | 0 | up |
| PHO | Glyma.01G091800 | GmPHO1;H1 | phosphate transporter PHO1 homolog 1 | 4.49036E-17 | up | 4.73518E-05 | up | 6.96313E-27 | up |
| Glyma.02G003700 | Glyma.02G003700 | phosphate transporter PHO1 | 3.41586E-06 | up | 1.54958E-09 | up | 1.9943E-118 | up |
| Glyma.02G130200 | Glyma.02G130200 | phosphate transporter PHO1 | 5.09505E-30 | up | 1.13986E-13 | up | 4.90666E-53 | up |
| PAP | Glyma.05G138400 | Glyma.05G138400 | purple acid phosphatase 8-like precursor | 3.7006E-102 | up | 0 | up | 0 | up |
| Glyma.05G247800 | Glyma.05G247800 | purple acid phosphatase 3-like precursor | 1.66114E-82 | up | 1.4355E-104 | up | 0 | up |
| Glyma.08G056400 | Glyma.08G056400 | purple acid phosphatase 17 isoform X1 | 4.0687E-283 | up | 0 | up | 1.1186E-146 | up |
| Glyma.08G093600 | GmPAP7 | purple acid phosphatase 7 | 1.254E-117 | up | 0 | up | 2.15838E-80 | up |
| Glyma.10G071000 | Glyma.10G071000 | purple acid phosphatase 22-like | 1.94468E-84 | up | 0 | up | 0 | up |
| PHR | Glyma.03G143600 | GmPHR8 | MYB-CC domain-containing transcription factor PHR8 | 1.36781E-16 | up | 8.45854E-34 | up | 8.53656E-34 | up |
| Glyma.10G039700 | GmPHR17 | MYB-CC domain-containing transcription factor PHR17 | 4.19826E-26 | up | 2.02548E-19 | up | 6.76769E-65 | up |
| Glyma.12G089100 | GmPHR20 | MYB-CC domain-containing transcription factor PHR20 | 0.006047071 | up | 0.00051873 | up | 9.67455E-15 | up |
| Glyma.13G126200 | GmPHR22 | MYB-CC domain-containing transcription factor PHR22 | 1.66203E-14 | up | 0.03630446 | up | 6.72447E-14 | up |
| Glyma.15G123100 | GmPHR25 | MYB-CC domain-containing transcription factor PHR25 | 3.28464E-44 | up | 3.95793E-15 | up | 4.3926E-19 | up |
| Glyma.18G201800 | GmPHR29 | MYB-CC domain-containing transcription factor PHR29 | 9.43884E-07 | up | 4.601E-203 | up | 8.30441E-62 | up |
| Glyma.19G146600 | GmPHR31 | MYB-CC domain-containing transcription factor PHR31 | 0.002189137 | up | 4.19243E-27 | up | 7.39044E-74 | up |
| ALMT | Glyma.05G233400 | ALMT9 | aluminum-activated malate transporter 9 | 2.35927E-11 | up | 2.11961E-18 | up | 0.001059126 | up |
| Glyma.19G199900 | ALMT8 | aluminum-activated malate transporter 8 | 0.907027979 | up | 0.000617432 | up | 0.048828821 | up |
